# Supplementary material for: Evaluating the Relative Vaccine Effectiveness of Adjuvanted Trivalent Influenza Vaccine Compared to High-Dose Trivalent and Other Egg-Based Influenza Vaccines among Older Adults in the US during the 2017–2018 Influenza Season
Source: PubMed Central journal article supplement (PMC7563546; doi:10.3390/vaccines8030446), 2020-08-07
Supplement: vaccines-08-00446-s001.pdf [file vaccines-08-00446-s001.pdf]

**Supplementary Table S1. Baseline Demographic Characteristics – Unadjusted**

| Vaccine Cohort<br>Characteristic | aTIV<br>N=234,313<br>A | TIV-HD<br>N=1,269,855<br>B | QIVe-SD<br>N=212,287<br>C | TIVe-SD<br>N=106,491<br>D | SMD <sup>1</sup> |              |              |
|----------------------------------|------------------------|----------------------------|---------------------------|---------------------------|------------------|--------------|--------------|
|                                  |                        |                            |                           |                           | A x B            | A x C        | A x D        |
| <b>Mean age</b>                  | 75.1                   | 75.0                       | 74.0                      | 74.5                      | -0.02            | <b>-0.19</b> | <b>-0.10</b> |
| SD                               | 6.3                    | 6.3                        | 6.7                       | 6.6                       |                  |              |              |
| Median                           | 74                     | 74                         | 73                        | 74                        |                  |              |              |
| <b>Age group (%)</b>             |                        |                            |                           |                           |                  |              |              |
| 65-74 years                      | 50.2%                  | 50.7%                      | 56.7%                     | 53.4%                     | 0.01             | <b>0.13</b>  | 0.07         |
| 75-84 years                      | 34.1%                  | 33.9%                      | 29.1%                     | 31.2%                     | 0.00             | <b>-0.11</b> | -0.06        |
| ≥85 years                        | 15.8%                  | 15.3%                      | 14.3%                     | 15.3%                     | -0.01            | -0.04        | -0.01        |
| <b>Female (%)</b>                | 60.0%                  | 59.9%                      | 59.8%                     | 60.5%                     | 0.00             | 0.00         | 0.01         |
| <b>Geographic region (%)</b>     |                        |                            |                           |                           |                  |              |              |
| Northeast                        | 15.8%                  | 17.1%                      | 15.5%                     | 12.3%                     | 0.04             | -0.01        | <b>-0.10</b> |
| Midwest                          | 11.8%                  | 18.9%                      | 17.8%                     | 9.9%                      | <b>0.20</b>      | <b>0.17</b>  | -0.06        |
| South                            | 53.4%                  | 43.2%                      | 39.7%                     | 43.3%                     | <b>-0.20</b>     | <b>-0.28</b> | <b>-0.20</b> |
| West                             | 19.1%                  | 20.8%                      | 27.1%                     | 34.4%                     | 0.04             | <b>0.19</b>  | <b>0.35</b>  |
| <b>Payer type (%)</b>            |                        |                            |                           |                           |                  |              |              |
| Cash                             | 0.5%                   | 0.3%                       | 0.8%                      | 0.8%                      | -0.02            | 0.05         | 0.05         |
| Medicaid                         | 0.0%                   | 0.1%                       | 0.2%                      | 0.1%                      | 0.01             | 0.04         | 0.03         |
| Medicare Part D                  | 33.5%                  | 28.8%                      | 15.4%                     | 15.6%                     | <b>-0.10</b>     | <b>-0.43</b> | <b>-0.43</b> |
| Medicare                         | 44.6%                  | 36.4%                      | 34.3%                     | 37.7%                     | <b>-0.17</b>     | <b>-0.21</b> | <b>-0.14</b> |
| Third party                      | 21.3%                  | 34.1%                      | 48.6%                     | 44.7%                     | <b>0.29</b>      | <b>0.60</b>  | <b>0.51</b>  |
| Other/Unknown                    | 0.1%                   | 0.3%                       | 0.6%                      | 1.1%                      | 0.03             | 0.08         | 0.12         |

<sup>1</sup> SMD (absolute) ≥0.1, bolded in the table, indicates significance  
SMD = standardized mean difference

Supplementary Table S2. Baseline Clinical Characteristics – Unadjusted

| Vaccine Cohort<br>Characteristic              | aTIV<br>N=234,313<br>A | TIV-HD<br>N=1,269,855<br>B | QIVe-SD<br>N=212,287<br>C | TIVe-SD<br>N=106,491<br>D | SMD <sup>1</sup> |              |              |
|-----------------------------------------------|------------------------|----------------------------|---------------------------|---------------------------|------------------|--------------|--------------|
|                                               |                        |                            |                           |                           | A x B            | A x C        | A x D        |
| <b>Month of flu vaccination (%)</b>           |                        |                            |                           |                           |                  |              |              |
| August                                        | 8.3%                   | 5.6%                       | 3.8%                      | 1.9%                      | <b>-0.11</b>     | <b>-0.19</b> | <b>-0.29</b> |
| September                                     | 27.2%                  | 31.6%                      | 26.8%                     | 22.0%                     | <b>0.10</b>      | -0.01        | <b>-0.12</b> |
| October                                       | 40.4%                  | 41.2%                      | 41.3%                     | 43.1%                     | 0.02             | 0.02         | 0.05         |
| November                                      | 13.9%                  | 14.0%                      | 16.6%                     | 18.9%                     | 0.00             | 0.07         | <b>0.14</b>  |
| December                                      | 5.3%                   | 4.4%                       | 6.3%                      | 7.1%                      | -0.04            | 0.05         | 0.08         |
| January                                       | 4.8%                   | 3.1%                       | 5.3%                      | 6.9%                      | -0.09            | 0.02         | 0.09         |
| <b>CCI score (%)</b>                          |                        |                            |                           |                           |                  |              |              |
| 0                                             | 57.2%                  | 55.1%                      | 49.6%                     | 45.3%                     | -0.04            | <b>-0.15</b> | <b>-0.24</b> |
| 1                                             | 20.7%                  | 21.4%                      | 22.3%                     | 22.9%                     | 0.02             | 0.04         | 0.05         |
| 2                                             | 11.8%                  | 12.3%                      | 13.8%                     | 15.0%                     | 0.01             | 0.06         | 0.09         |
| 3+                                            | 10.3%                  | 11.3%                      | 14.2%                     | 16.9%                     | 0.03             | <b>0.12</b>  | <b>0.19</b>  |
| <b>Mean CCI score</b>                         | <b>0.8</b>             | <b>0.9</b>                 | <b>1.1</b>                | <b>1.2</b>                | <b>0.05</b>      | <b>0.17</b>  | <b>0.27</b>  |
| SD                                            | 1.3                    | 1.3                        | 1.5                       | 1.5                       |                  |              |              |
| Median                                        | 0                      | 0                          | 1                         | 1                         |                  |              |              |
| <b>Pre-index comorbidities (%)</b>            |                        |                            |                           |                           |                  |              |              |
| Asthma                                        | 3.5%                   | 3.8%                       | 4.3%                      | 4.7%                      | 0.01             | 0.04         | 0.06         |
| Blood disorders                               | 0.3%                   | 0.3%                       | 0.3%                      | 0.3%                      | 0.00             | 0.00         | 0.01         |
| Chronic lung disease                          | 8.3%                   | 8.8%                       | 10.2%                     | 11.4%                     | 0.02             | 0.07         | 0.11         |
| Diabetes                                      | 19.8%                  | 21.5%                      | 26.1%                     | 29.5%                     | 0.04             | <b>0.15</b>  | <b>0.23</b>  |
| Heart disease                                 | 11.9%                  | 12.5%                      | 14.4%                     | 16.2%                     | 0.02             | 0.07         | <b>0.12</b>  |
| Kidney disorders                              | 8.2%                   | 8.7%                       | 10.0%                     | 11.9%                     | 0.02             | 0.07         | <b>0.13</b>  |
| Liver disorders                               | 2.1%                   | 2.1%                       | 2.8%                      | 3.1%                      | 0.00             | 0.04         | 0.06         |
| Neurological or neurodevelopmental conditions | 4.7%                   | 4.9%                       | 5.2%                      | 5.3%                      | 0.01             | 0.02         | 0.03         |
| Weakened immune system <sup>2</sup>           | 9.6%                   | 9.9%                       | 9.9%                      | 9.8%                      | 0.01             | 0.01         | 0.00         |
| IBD                                           | 0.6%                   | 0.6%                       | 0.6%                      | 0.6%                      | 0.00             | 0.00         | 0.00         |

| Characteristic                                  | Vaccine Cohort | aTIV<br>N=234,313 | TIV-HD<br>N=1,269,855 | QIVe-SD<br>N=212,287 | TIVe-SD<br>N=106,491 | SMD <sup>1</sup> |       |  |
|-------------------------------------------------|----------------|-------------------|-----------------------|----------------------|----------------------|------------------|-------|--|
|                                                 | A              | B                 | C                     | D                    | A x B                | A x C            | A x D |  |
| <b>Indicators of frail health status (%)</b>    |                |                   |                       |                      |                      |                  |       |  |
| Home oxygen use                                 | 3.9%           | 4.1%              | 4.7%                  | 5.1%                 | 0.01                 | 0.04             | 0.06  |  |
| Wheelchair use                                  | 2.1%           | 2.3%              | 2.8%                  | 2.8%                 | 0.01                 | 0.05             | 0.05  |  |
| Walker use                                      | 3.2%           | 3.3%              | 3.6%                  | 3.7%                 | 0.01                 | 0.02             | 0.03  |  |
| Dementia                                        | 1.3%           | 1.3%              | 1.3%                  | 1.5%                 | 0.00                 | 0.00             | 0.02  |  |
| Urinary catheter use                            | 0.4%           | 0.4%              | 0.4%                  | 0.4%                 | 0.00                 | 0.00             | 0.00  |  |
| Falls                                           | 0.9%           | 0.9%              | 0.8%                  | 0.9%                 | 0.00                 | 0.00             | 0.01  |  |
| Fractures                                       | 0.6%           | 0.6%              | 0.6%                  | 0.6%                 | 0.00                 | 0.00             | 0.01  |  |
| <b>Pre-index hospitalization (%)</b>            | 7.7%           | 7.9%              | 8.2%                  | 8.6%                 | 0.01                 | 0.02             | 0.03  |  |
| <b>Mean pre-index outpatient pharmacy costs</b> | \$2,400        | \$2,425           | \$2,380               | \$2,540              | 0.02                 | -0.01            | 0.07  |  |
| SD                                              | \$6,037        | \$6,037           | \$6,094               | \$5,229              |                      |                  |       |  |
| Median                                          | \$861          | \$885             | \$807                 | \$990                |                      |                  |       |  |
| <b>Mean inpatient costs</b>                     | \$810          | \$826             | \$933                 | \$1,064              | 0.01                 | 0.02             | 0.03  |  |
| SD                                              | \$9,183        | \$7,795           | \$10,924              | \$9,239              |                      |                  |       |  |
| Median                                          | \$0            | \$0               | \$0                   | \$0                  |                      |                  |       |  |
| <b>Mean outpatient medical costs</b>            | \$1,738        | \$1,692           | \$1,686               | \$1,734              | 0.00                 | -0.03            | -0.03 |  |
| SD                                              | \$6,309        | \$6,620           | \$6,571               | \$6,282              |                      |                  |       |  |
| Median                                          | \$400          | \$396             | \$380                 | \$378                |                      |                  |       |  |
| <b>Mean TOTAL pre-index costs<sup>3</sup></b>   | \$4,949        | \$4,943           | \$4,999               | \$5,338              | 0.00                 | -0.03            | 0.04  |  |
| SD                                              | \$13,376       | \$12,274          | \$14,748              | \$13,109             |                      |                  |       |  |
| Median                                          | \$2,039        | \$2,043           | \$1,909               | \$2,140              |                      |                  |       |  |

1 SMD (absolute)  $\geq 0.1$ , bolded in the table, indicates significance

2 Including: HIV/AIDS; metastatic cancer and acute leukemia; lung or upper digestive or other severe cancer; lymphatic, head, neck, brain, or major cancer; breast, prostate, colorectal, or other cancer; and disorders of immunity

CCI = Charlson Comorbidity Index Score; IBD = Inflammatory bowel diseases (ulcerative colitis and Crohn's disease); SMD = Standardized mean difference

3 TOTAL = outpatient pharmacy + inpatient + outpatient medical
